# **External error attribution dampens efferent-based predictions but not proprioceptive changes in hand localization**

## **Author names**

Raphael Q. Gastrock\*<sup>1,2</sup>, Shanaathanan Modchalingam<sup>1,3</sup>, Bernard Marius 't Hart<sup>1</sup>,  
Denise Y. P. Henriques<sup>1-3</sup>

## **Affiliations**

<sup>1</sup>Centre for Vision Research, York University, Toronto, Ontario, Canada, M3J 1P3

<sup>2</sup>Department of Psychology, York University, Toronto, Ontario, Canada, M3J 1P3

<sup>3</sup>School of Kinesiology and Health Science, York University, Toronto, Ontario, Canada,  
M3J 1P3

\*Corresponding author: Raphael Q. Gastrock, [raphaelgastrock@gmail.com](mailto:raphaelgastrock@gmail.com)

## Abstract

1 In learning and adapting movements in changing conditions, people attribute the errors  
2 they experience to a combined weighting of internal or external sources. As such, error  
3 attribution that places more weight on external sources should lead to decreased  
4 updates in our internal models for movement of the limb or estimating the position of the  
5 effector, i.e. there should be reduced implicit learning. However, measures of implicit  
6 learning are the same whether or not we induce explicit adaptation with instructions  
7 about the nature of the perturbation. Here we evoke clearly external errors by either  
8 demonstrating the rotation on every trial, or showing the hand itself throughout training.  
9 Implicit reach aftereffects persist, but are reduced in both groups. Only for the group  
10 viewing the hand, changes in hand position estimates suggest that predicted sensory  
11 consequences are not updated, but only rely on recalibrated proprioception. Our results  
12 show that estimating the position of the hand incorporates source attribution during  
13 motor learning, but recalibrated proprioception is an implicit process unaffected by  
14 external error attribution.

## Introduction

15 Knowing our limbs' positions is crucial for our ability to move competently. Moreover,  
16 changing circumstances may cause movement errors, which require us to adapt our  
17 motor control to restore performance <sup>[1-5]</sup>. When errors are not caused by our own motor  
18 system, but are instead externally caused, the way in which movements are adapted to  
19 counter them should change <sup>[6-10]</sup>. Externally caused errors should also affect our  
20 estimate of the position of our limb, but this has not been directly investigated yet. Here,  
21 we introduce two types of movement feedback to investigate how our limb position  
22 estimates may be affected when errors are clearly not caused by the individual.

23 In reaching movements, adaptive changes that result from small or gradually  
24 introduced visual or mechanical perturbations are traditionally considered as largely  
25 implicit <sup>[2,11]</sup>. Implicit adaptation is manifested by reach aftereffects, persistent deviations  
26 in hand movements after perturbation removal, suggesting an internal representational  
27 remapping has occurred in the brain <sup>[5,11-12]</sup>. Reach aftereffects also occur with larger  
28 and abruptly introduced perturbations, as well as when participants are made aware of  
29 the nature of the perturbation. In these cases, explicit processes account for a part of  
30 the resulting adaptive change <sup>[13-18]</sup>. Thus, both explicit and implicit processes contribute  
31 to adaptation <sup>[19-22]</sup>. Here, we first quantify implicit and explicit contributions to learning  
32 with responses to different visual manipulations. These manipulations differentially  
33 demonstrate the nature and source of errors experienced, thereby varying the extent of  
34 external error attribution.

35 Motor adaptation leads not only to changes in motor performance, but previous  
36 research has also found that adapting reach movements to visual or mechanical  
37 perturbations leads to changes in proprioceptive estimates of hand location <sup>[23-25]</sup>, even  
38 if the two perturbations likely have different underlying mechanisms <sup>[26-27]</sup>. This  
39 proprioceptive recalibration emerges quickly <sup>[28-29]</sup> and reflects about 20% of the visual  
40 misalignment of the hand <sup>[23-24]</sup>. Recalibrated proprioception is also preserved in aging  
41 <sup>[30]</sup> and in different perturbations (rotations and translations <sup>[23]</sup>, force fields <sup>[31]</sup>, gains <sup>[32]</sup>,

42 split-belt walking [33-34]). In visuomotor rotations, it seems that a visuo-proprioceptive  
43 discrepancy is sufficient to drive proprioceptive recalibration, and leads to reach  
44 aftereffects that mimic this proprioceptive shift [29,35-37]. Thus, proprioceptive recalibration  
45 is ubiquitous, and seems to contribute to motor performance.

46 Apart from afferent proprioceptive information, hand localization is also based on  
47 predicted sensory consequences of the movement, calculated by internal forward  
48 models that use an efference copy of the outgoing motor command [38-39]. These  
49 efferent-based updates are considered a pre-requisite for implicit adaptation [3,40], and  
50 seem to contribute to reach aftereffects separately from recalibrated proprioception  
51 [29,35,41]. Efferents and non-visual afferents should both be present when estimating hand  
52 location after self-generated 'active' movements, while robot-generated 'passive'  
53 movements should only allow afferent-based proprioceptive signals. Thus, active and  
54 passive movements assess the relative contributions of afferent and efferent signals to  
55 hand position estimates [18,32,41], which should both be implicit.

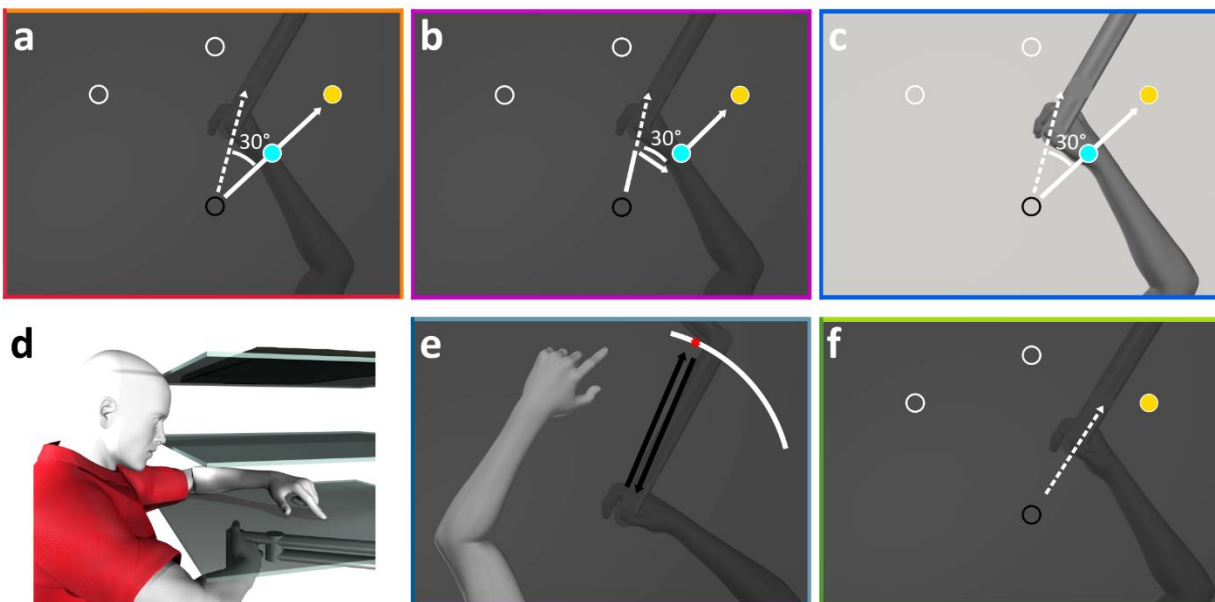

**Fig. 1: Experimental apparatus and stimuli.** a-c: Top-down view displaying the different manipulations for the reach-training tasks, where the cursor (light blue) is rotated 30° CW. Reaches are made to one of three possible target locations (indicated as hollow white circles for reference), but only one target appeared on every trial (yellow disc). a: In both the Instructed and Control groups, participants do not see their hand, and the cursor has a constant rotation throughout each trial. b: Participants in the Cursor Jump group see the cursor “jump” to the 30° CW rotation mid-reach on every trial. c: In the Hand View group, participants see both their actual, illuminated hand and the cursor. d: Participants sit on an adjustable chair in a dark room and hold a robot manipulandum located below a touch screen (bottom surface), while viewing stimuli through a reflective tint (middle surface) which projects stimuli generated from a downward facing computer screen (top surface). e: Active and Passive Localization trials: Participants use their visible left hand to indicate on the touch screen where they have crossed the arc with their unseen right hand, after voluntarily generating a right-handed movement (active) or after a robot-generated movement (passive). f: No-cursor trials: Reaches are made to the same three targets in the absence of visual feedback of the cursor or hand.

56 Since both contributions to hand location estimates should be implicit, they  
57 should be reduced or not occur when errors are attributed externally, as implicit learning

58 is engaged less or not at all. In other words, given that the cursor in a visuomotor  
59 rotation task is considered a representation of the hand <sup>[42]</sup>, it would be intuitive for  
60 people to not update estimates of their hand location, when it is clear that the error is  
61 being caused by an external source. However, modulating explicit knowledge about the  
62 nature of the perturbation, by providing instructions or increasing the perturbation size,  
63 does not affect persistent shifts in both proprioceptive recalibration and updating of  
64 predicted sensory consequences <sup>[18]</sup>. In the current study, we instead investigate the  
65 effect of the external attribution of errors on both afferent and efferent-based changes.  
66 To do this, we vary the extent that people attribute the error they experience to a cursor  
67 representing their hand position, while holding a robot manipulandum and training in a  
68 visuomotor rotation task (Fig. 1a-1d). The experiment consists of two sessions: a  
69 baseline, aligned session, where visual feedback of the cursor matched the actual hand  
70 position, and a rotated session where participants adapt to a 30° rotated hand-cursor  
71 (Fig. 2). In two groups that either receive instructions about the nature of the rotation

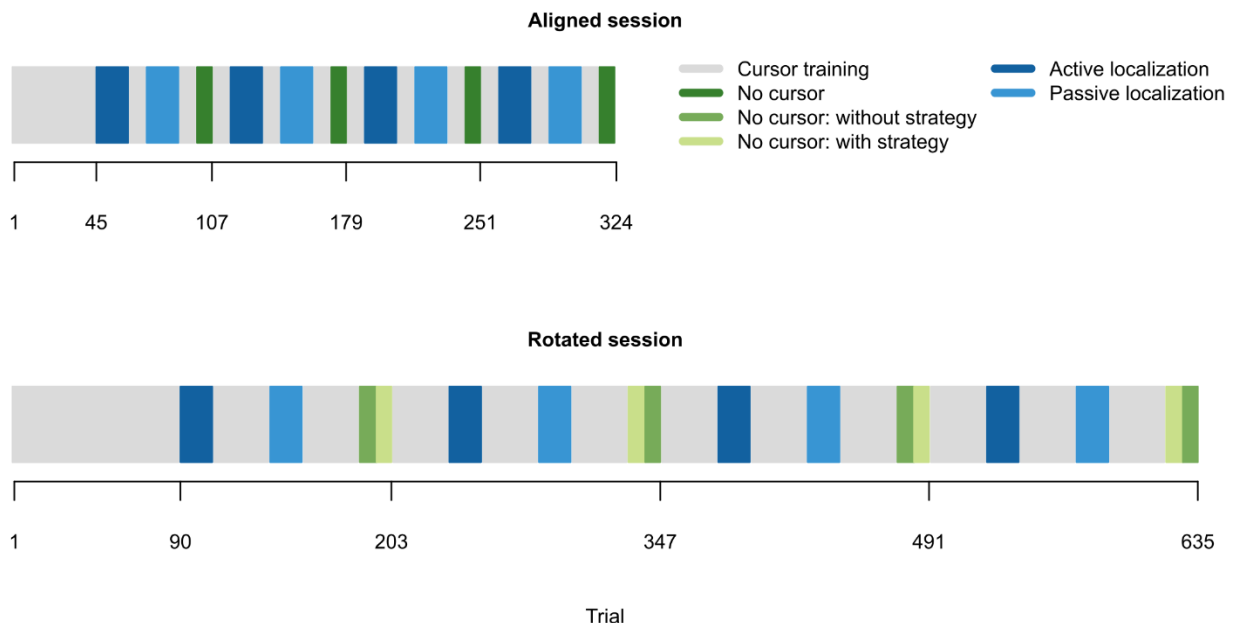

**Fig. 2: Experiment Schedule. Top:** First session, and considered as baseline, where the cursor was aligned with the position of the right hand. Participants performed 45 cursor training trials followed by blocks of active localization (18 trials/block), passive localization (18 trials/block), and no-cursor trials (9 trials/block). Top-up cursor training trials (9 trials/block) were interleaved in between localization and no-cursor blocks. **Bottom:** Second session where the cursor was rotated 30° CW, relative to the position of the right hand. Participants performed 90 cursor training trials followed by blocks of active localization (18 trials/block), passive localization (18 trials/block), and two variations of no-cursor trials (with- or without-strategy; 9 trials/block). Top-up cursor training trials (30 trials/block) were interleaved in between localization and no cursor blocks. For both aligned and rotated sessions, passive localization always proceeded after active localization, as endpoint locations of the robot-generated movements in passive localization are based on locations that participants voluntarily moved towards during active localization. For no-cursor trials in the rotated session, the two variations are counterbalanced both within and between participants. That is, with- and without-strategy trials alternate within one participant, and the variation that an individual starts with is also alternated between participants.

72 and a strategy to counter for it, or not (Instructed and Control groups; Fig. 1a), we  
73 expect external error attribution to be minimal, as only explicit knowledge is modulated.

74 In addition, we test two other groups that also do not receive instructions but either have  
75 visual feedback of the hand-cursor jump to the imposed rotation mid-reach on every  
76 training trial (Cursor Jump group; Fig. 1b) or a view of the actual hand of the participant  
77 is present along with the rotated cursor (Hand View group; Fig. 1c). We expect that  
78 these manipulations should make clear to participants that the cursor errors are caused  
79 externally. We interleave a localization task (Fig. 1e) and no-cursor reaches (Fig. 1f)  
80 across blocks of cursor training in both aligned and rotated sessions, to investigate how  
81 our manipulations affect changes in hand location estimates and motor behaviour  
82 respectively, following adaptation (Fig. 2). We hypothesize that with increased external  
83 error attribution, both changes in motor behaviour and shifts in afferent and efferent-  
84 based estimates of hand localization will decrease.

## Results

85 Before investigating how external error attribution affects changes in motor behaviour  
86 and hand localization, we first confirm that all groups appropriately counter the  
87 perturbation by the end of 90 training trials (Fig. 3a) and observe that reach trajectories  
88 are not qualitatively different (Fig. 4). We test for group differences at different time  
89 points during adaptation training (three blocks: trials 1-3, 4-6, 76-90) using a 3X4 mixed  
90 design ANOVA, with block (blocks 1, 2, and 3) as a within-subject factor and group  
91 (Control, Instructed, Cursor Jump, Hand View) as a between-subject factor. We find  
92 main effects of group ( $F_{(3,86)} = 5.678$ ,  $p = .001$ , generalized eta squared ( $\eta^2_G$ ) = .092,  
93  $BF_{incl} > 1 \cdot 10^6$ ) and block ( $F_{(2,172)} = 78.411$ ,  $p < .001$ ,  $\eta^2_G = .307$ ,  $BF_{incl} > 3 \cdot 10^{14}$ ), and a  
94 group X block interaction ( $F_{(6,172)} = 7.856$ ,  $p < .001$ ,  $\eta^2_G = .118$ ,  $BF_{incl} > 4 \cdot 10^5$ ). This  
95 suggests that, as expected, group differences in learning rates are modulated by the  
96 block of trials. Follow-up tests comparing each group to the Control group, show the  
97 expected initial advantage of instructions in reducing reach direction error within block  
98 one (Fig. 3a-3b), as only the Instructed group differs from the Control group ( $t_{(148)} =$   
99  $4.632$ ,  $p < .001$ , eta squared ( $\eta^2$ ) = .127,  $BF_{10} > 1 \cdot 10^5$ ). In the second block (Fig. 3c),  
100 no groups differ from the Control group (Instructed:  $t_{(148)} = 1.922$ ,  $p = .295$ ,  $\eta^2 = .024$ ,  
101  $BF_{10} = 6.506$ ; Cursor Jump:  $t_{(148)} = 2.538$ ,  $p = .071$ ,  $\eta^2 = .042$ ,  $BF_{10} = 3.386$ ; Hand View:  
102  $t_{(148)} = 0.910$ ,  $p = .934$ ,  $\eta^2 = .006$ ,  $BF_{10} = 0.381$ ). Bayesian analysis show moderate  
103 evidence for a difference between the Control group and the Instructed or Cursor Jump  
104 groups, but we note that these are calculated without correcting for multiplicity. For the  
105 last block (Fig. 3a,3d), an ANOVA on the effect of group on angular reach deviations  
106 shows that the groups do not differ from each other ( $F_{(3,86)} = 0.561$ ,  $p = .642$ ,  $\eta^2_G = .019$ ,  
107  $BF_{10} = 0.115$ ), suggesting that our manipulations do not affect the asymptotic level of  
108 adaptation. Thus, any effects of training on changes in motor behaviour and hand  
109 localization can't be explained by levels of adaptation in the different groups.

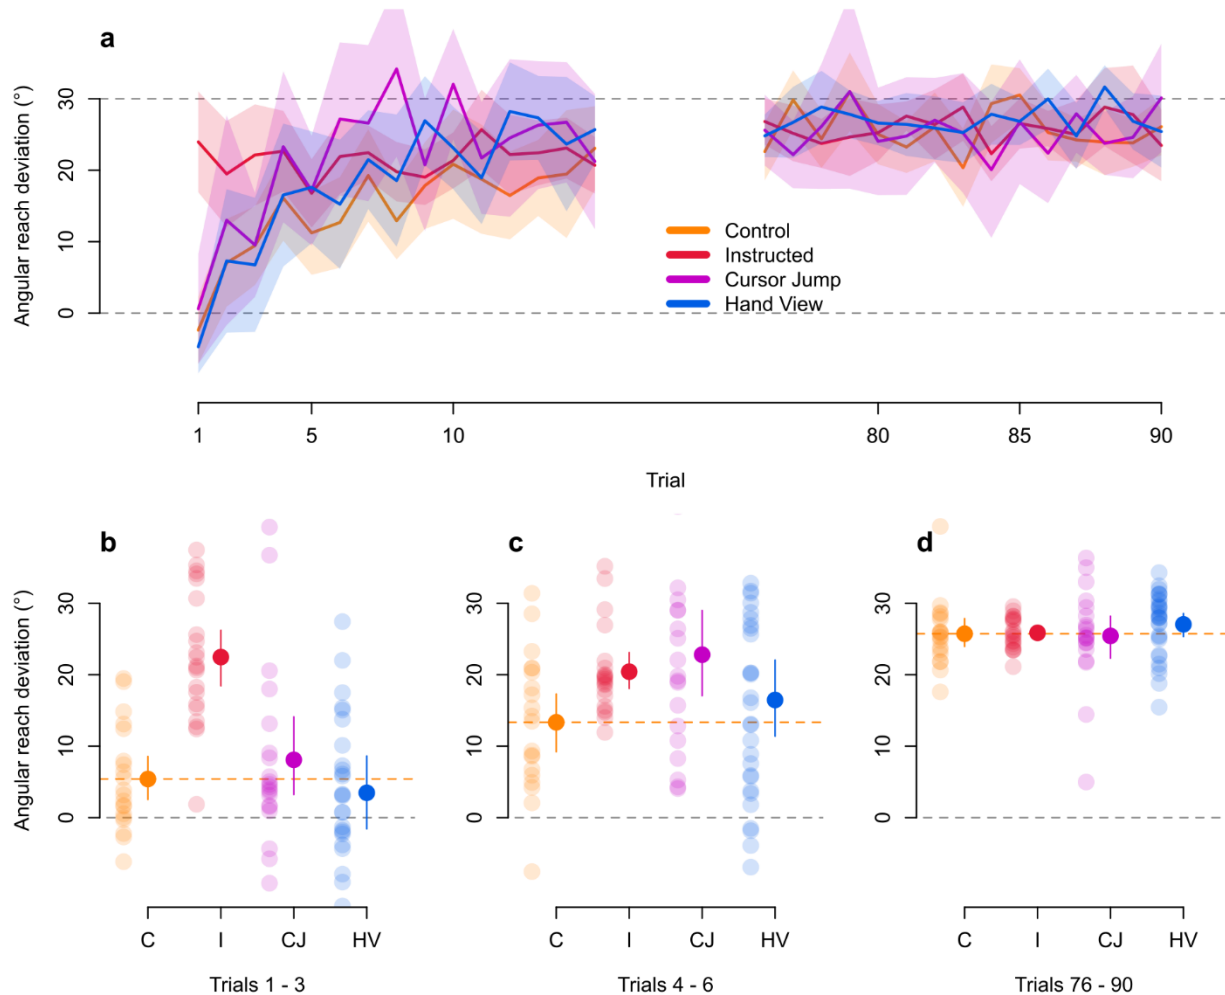

**Fig. 3: Rate of learning during adaptation training.** **a:** Only the first and last 15 trials of adaptation training are shown. Grey dashed line at the 30° mark indicates the direction that the hand must deviate in order to fully and successfully counter for the perturbation. The grey dashed line at the 0° mark indicates reach directions similar to those in the baseline, aligned session (i.e., no compensation). The Instructed group shows an initial advantage in successfully countering for the perturbation as early as the first trial. There are no differences in reaches performed by participants from all groups for the last 15 trials. Solid lines are group means and shaded regions are corresponding 95% confidence intervals. **b-d:** Individual participant data from each group are shown, separated in three blocks of trial sets during adaptation training. Orange dashed line indicates mean for the Control group. Solid dots and error bars correspond to the group mean and bootstrapped 95% confidence intervals.

### Implicit aftereffects persist despite external error attribution

110 To investigate the effects of external error attribution on changes in motor behaviour, we  
 111 use no-cursor trials both before and after adaptation (Fig. 1f). After adaptation, however,  
 112 we use a process dissociation procedure (PDP), a cognitive research methodology  
 113 adapted by Werner et al. [16] for motor learning, which measures awareness by having  
 114 participants either express or repress a learned movement (see also [17-18,43]). Here, we  
 115 ask people to make open-loop reaches, and move their unseen right hand to targets,  
 116 while either including any strategy they learned to counter for the perturbation (with-  
 117 strategy reaches) or excluding it (without-strategy reaches). With explicit awareness  
 118 about the nature of the perturbation, we expect a difference between these reaches, as



119 the ability to consciously produce a strategy adds explicit contributions on top of implicit  
120 contributions to learning. Meanwhile, excluding a strategy reflects only implicit  
121 contributions, which are not consciously accessible. Thus, the PDP allows us to  
122 measure both implicit and explicit adaptation.

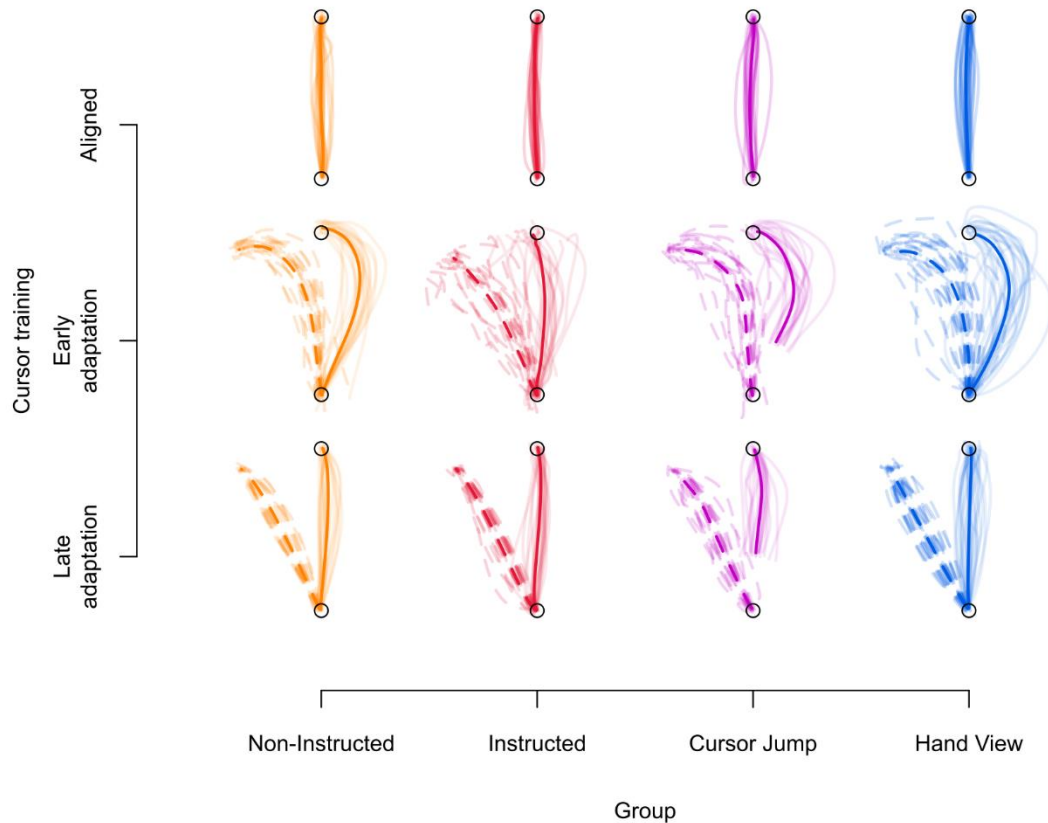

**Fig. 4: Individual and average reach trajectories.** The trajectory of reaches across all participants within their respective groups are shown with light coloured lines. Each participant's trajectory combines reaches during the last three trials of the first block of cursor training in the aligned session (**top**), as well as the first (**middle**) and last three (**bottom**) trials of the first block of cursor training in the rotated session. Light solid lines indicate the trajectory of the hand-cursor and light dashed lines indicate the trajectory of the hand. Only solid lines are shown in the aligned session, as both hand and hand-cursor trajectories are similar. Group means for the hand trajectories are indicated with the dark dashed line, and dark solid lines indicate the mean hand-cursor trajectory. All groups seem to produce similar reach trajectories, across the different time points in the experiment, regardless of condition. Moreover, despite curved reaches during early adaptation training, reach trajectories are straight towards the end of adaptation training.

123 We first compare aligned no-cursor trials and without-strategy no-cursor reaches  
124 in the rotated session, to test for implicit reach aftereffects (Fig. 2, 5). We conduct a 2X4  
125 mixed design ANOVA with session (aligned or rotated) as a within-subject factor and

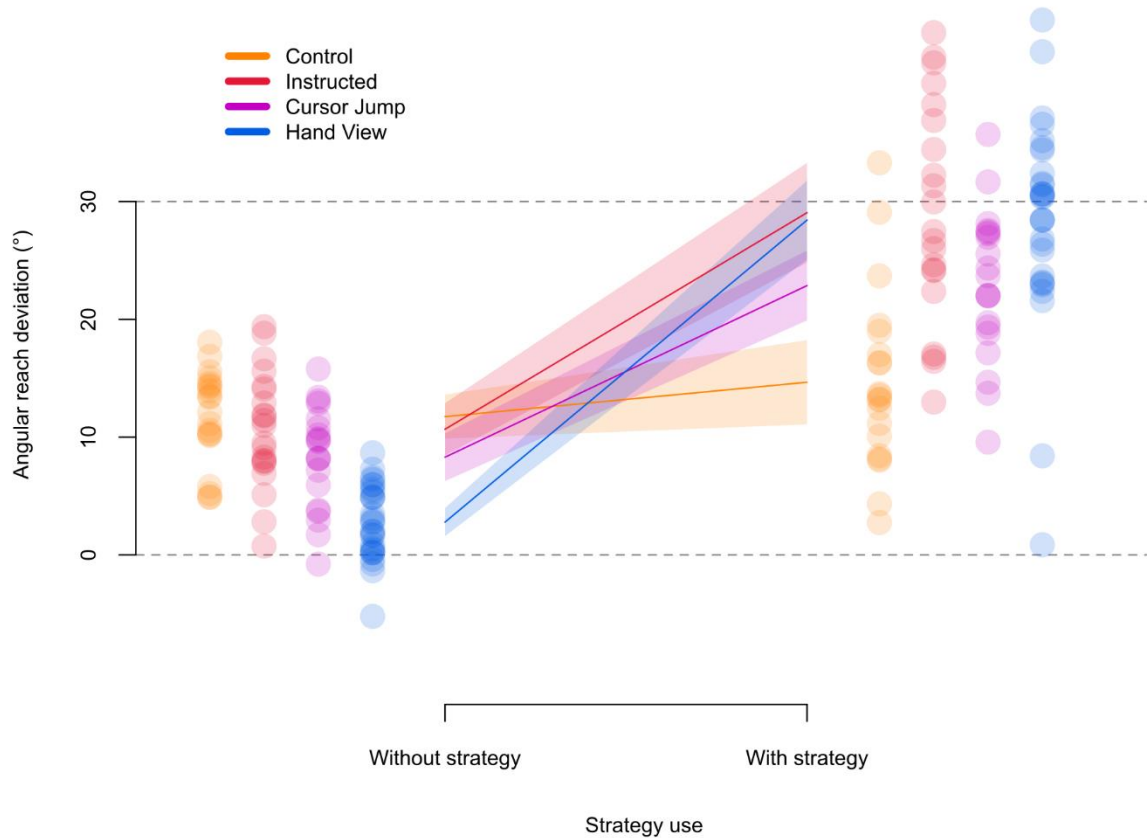

**Fig. 5: No cursor reaches and strategy use.** Angular reach deviations of the hand per group, while either excluding (without-strategy) or including (with-strategy) any strategies developed during adaptation training. Grey dashed line at the 30° mark indicates angular reach deviations equivalent to full compensation for the perturbation, and grey dashed line at the 0° mark indicates reaches that did not correct for the perturbation. Only the Control group was unable to switch between excluding and including a strategy to counter for the perturbation. Implicit reach aftereffects, indicated by without-strategy angular reach deviations, are reduced for the Cursor Jump group and are further reduced in the Hand View group. Solid lines are group means and shaded regions are corresponding 95% confidence intervals. Individual participant data from each group are shown for both types of strategy use.

126 group as a between-subject factor. We confirm the presence of reach aftereffects with a  
 127 main effect of session ( $F_{(1,86)} = 373.023, p < .001, \eta^2_G = .530, BF_{incl} = inf.$ ). Moreover, we  
 128 find a main effect of group ( $F_{(3,86)} = 16.576, p < .001, \eta^2_G = .230, BF_{incl} > 9 \cdot 10^{13}$ ) and an  
 129 interaction between session and group ( $F_{(3,86)} = 22.605, p < .001, \eta^2_G = .170, BF_{incl} > 4 \cdot$   
 130  $10^8$ ), suggesting that the effect of session is modulated by group. Follow-up tests show  
 131 that aligned and without-strategy reach deviations differ within each group (Instructed:  
 132  $t_{(86)} = -11.830, p < .001, \eta^2 = .619, BF_{10} > 1 \cdot 10^6$ ; Control:  $t_{(86)} = -12.912, p < .001, \eta^2 =$   
 133  $.660, BF_{10} > 1 \cdot 10^8$ ; Cursor Jump:  $t_{(86)} = -9.050, p < .001, \eta^2 = .488, BF_{10} > 4 \cdot 10^5$ ;  
 134 Hand View:  $t_{(86)} = -4.037, p < .001, \eta^2 = .159, BF_{10} = 1 \cdot 10^3$ ). This means that implicit  
 135 reach aftereffects are present in each group. To address how the effect of session is  
 136 modulated by group, follow-up tests compare implicit reach aftereffects for each group



137 to those in the Control group. We find that the Instructed group doesn't differ from the  
138 Control group ( $t_{(86)} = -0.722$ ,  $p = .922$ ,  $\eta^2 = .006$ , odds = 0.099), but the Hand View ( $t_{(86)} =$   
139  $-7.538$ ,  $p < .001$ ,  $\eta^2 = .398$ , odds  $> 7 \cdot 10^3$ ) group does, suggesting that external error  
140 attribution in the Hand View group leads to reduced implicit reach aftereffects,  
141 compared to the Instructed and Control groups. Frequentist analysis shows that the  
142 Cursor Jump group differs from the Control group ( $t_{(86)} = -3.419$ ,  $p = .004$ ,  $\eta^2 = .120$ ), but  
143 this is not supported by Bayesian analysis (odds = 0.875). Furthermore, the reduction in  
144 aftereffects is more pronounced for the Hand View group compared to the Cursor Jump  
145 group ( $t_{(86)} = 3.818$ ,  $p = .001$ ,  $\eta^2 = .145$ , odds = 2.220). In short, reach aftereffects persist  
146 across groups, but are greatly reduced for the Hand View group.

147 After confirming the presence of reach aftereffects, we use the PDP to assess  
148 explicit contributions to learning, by comparing with- and without-strategy no-cursor  
149 reaches (Fig. 5). We conduct a 2X4 mixed design ANOVA with strategy use (without-  
150 strategy or with-strategy) as a within-subject factor and group as a between-subject  
151 factor. We find main effects of strategy use ( $F_{(1,86)} = 285.493$ ,  $p < .001$ ,  $\eta^2_G = .592$ ,  $BF_{incl}$   
152  $= \text{inf.}$ ) and group ( $F_{(3,86)} = 6.779$ ,  $p < .001$ ,  $\eta^2_G = .118$ ,  $BF_{incl} > 1 \cdot 10^{13}$ ), and a strategy  
153 use and group interaction ( $F_{(3,86)} = 28.678$ ,  $p < .001$ ,  $\eta^2_G = .304$ ,  $BF_{incl} > 1 \cdot 10^{13}$ ). This  
154 suggests that the effect of strategy use in at least one group is different from the other  
155 groups. Follow-up tests compare with- and without-strategy angular reach deviations for  
156 each group separately. We find no evidence for or against an effect of strategy use in  
157 the Control group ( $t_{(86)} = -1.529$ ,  $p = .427$ ,  $\eta^2 = .026$ ,  $BF_{10} = 0.940$ ), but do see a  
158 difference in strategy use in the other groups (Instructed:  $t_{(86)} = -9.877$ ,  $p < .001$ ,  $\eta^2 =$   
159  $.531$ ,  $BF_{10} > 3 \cdot 10^6$ ; Cursor Jump:  $t_{(86)} = -7.637$ ,  $p < .001$ ,  $\eta^2 = .404$ ,  $BF_{10} > 5 \cdot 10^4$ ;  
160 Hand View:  $t_{(86)} = -16.185$ ,  $p < .001$ ,  $\eta^2 = .753$ ,  $BF_{10} > 5 \cdot 10^{11}$ ). Thus, despite receiving  
161 no instructions, both Cursor Jump and Hand View groups can evoke an explicit strategy  
162 like the Instructed group.

### Changes in afferent-based estimates of hand localization persist

163 We then investigate the effects of external error attribution on afferent and efferent-  
164 based shifts in hand location estimates. We use localization trials (Fig. 1e, 2), where  
165 participants indicate with their visible left hand, the position of their unseen right hand.  
166 Hand localization is either based on both afferent and efferent contributions (active  
167 localization) or based mainly on afferent contributions (passive localization). All groups  
168 appear to show shifts in hand localization, despite external error attribution (Fig. 6).  
169 Moreover, these shifts seem larger in active than passive localization for each group,  
170 except for the Hand View group (Fig. 6a-6b, 6d-6e). To test if training affected hand  
171 location estimates, we conduct a 2X2X4 mixed design ANOVA on localization error with  
172 session (aligned or rotated) and movement type (active or passive) as within-subject  
173 factors and group as a between-subject factor. We find a main effect of session ( $F_{(1,86)} =$   
174  $82.972$ ,  $p < .001$ ,  $\eta^2_G = .199$ ,  $BF_{incl} = \text{inf.}$ ) and group ( $F_{(3,86)} = 10.214$ ,  $p < .001$ ,  $\eta^2_G =$   
175  $.195$ ,  $BF_{incl} > 1 \cdot 10^5$ ), an interaction between session and group ( $F_{(3,86)} = 2.895$ ,  $p =$   
176  $.040$ ,  $\eta^2_G = .025$ ,  $BF_{incl} = 354.651$ ) and between session and movement type ( $F_{(1,86)} =$   
177  $16.802$ ,  $p < .001$ ,  $\eta^2_G = .004$ ,  $BF_{incl} = 0.169$ ). This suggests that estimates of hand  
178 position do shift despite external error attribution, but these shifts are modulated by  
179 group and movement type. Bayesian analysis suggests that including the session and  
180 movement type interaction does not lead to the best model ( $BF_{10} \text{ best model} > 1 \cdot 10^{34}$ ).

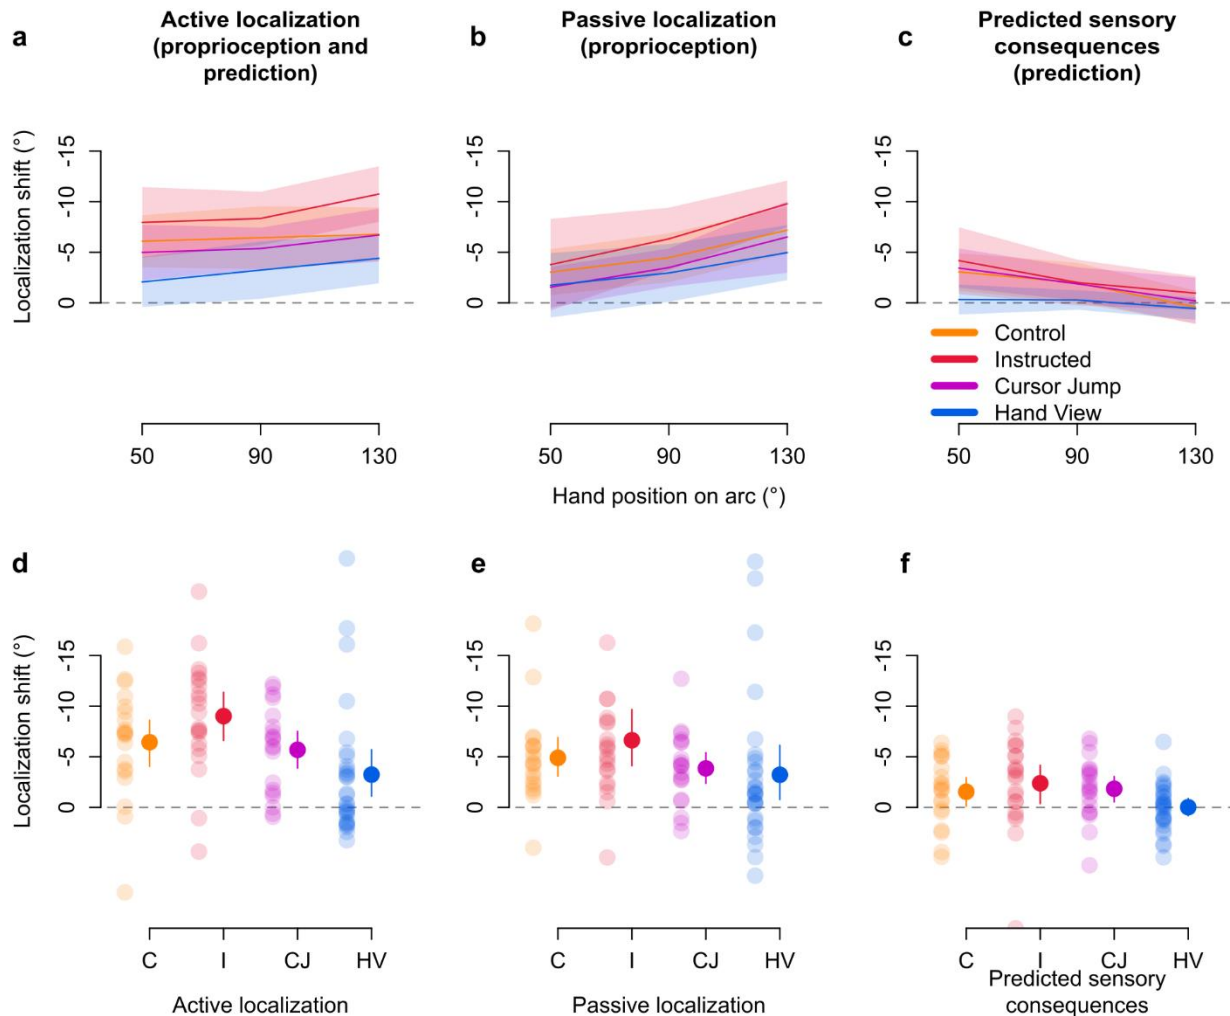

**Fig. 6: Afferent and efferent-based changes in hand location estimates.** During localization trials, the arc stimulus is presented and participants either move, or are moved, towards different points on the arc. Shifts in localizing the unseen right hand following adaptation training after **a**: self-generated movements (active localization), **b**: robot-generated movements (passive localization), and **c**: the difference between active and passive localization as a measure of updates in efferent-based estimates (predicted sensory consequences). Grey dashed line at the 0° mark indicates the absence of shifts, while positive and negative values indicate the direction of shifts. Solid lines correspond to group means at each of three hand positions on the arc, which mark the position in polar coordinates of where the arc stimuli are centred on during these trials. These positions closely match the target locations during adaptation training and no-cursor reaches. Shaded regions are corresponding 95% confidence intervals. **d-f**: Individual participant data for shifts in hand localization are shown in transparent dots, separated according to group and movement type. Solid dots and error bars to the side of individual data correspond to group means and bootstrapped 95% confidence intervals.

181 Nonetheless, as planned, we consider movement type in the following frequentist test.  
 182 We analyze the effects of group and movement type using a 2X4 mixed design ANOVA  
 183 on localization shifts (i.e. difference in localization error between rotated and aligned  
 184 sessions), with movement type as a within-subject factor and group as a between-  
 185 subject factor. We find a main effect of movement type ( $F_{(1,86)} = 16.802, p < .001, \eta^2_G =$   
 186  $.016, BF_{incl} = 62.496$ ) and group ( $F_{(3,86)} = 2.895, p = .040, \eta^2_G = .085, BF_{incl} = 2.540$ ), but  
 187 no interaction ( $F_{(3,86)} = 2.425, p = .071, \eta^2_G = .007, BF_{incl} = 1.849$ ), which is supported by

188 Bayesian analysis showing that the best model does not include this interaction ( $BF_{10}$   
189 best model = 131.040). The main effect of movement type is expected because active  
190 movements contain afferent and efferent contributions to hand localization, while  
191 passive movements only have afferent contributions. For follow-up tests on the group  
192 effect, we compare the localization shifts of each group to the other groups regardless  
193 of movement type, and find that the Hand View group differs from the Instructed group  
194 ( $t_{(86)} = 2.901$ ,  $p = .028$ ,  $\eta^2 = .089$ , odds = 14.120). Regardless, given the persistent shifts  
195 in hand position estimates, we investigate the afferent and efferent contributions for  
196 each group separately.

197 Passive localization should rely mainly on updated afferents, or recalibrated  
198 proprioception. We confirm the persistence of passive localization shifts across all  
199 groups with one-tailed t-tests that compare the mean passive localization shift of each  
200 group to zero (Instructed:  $t_{(20)} = -4.614$ ,  $p < .001$ ,  $d = 1.007$ ,  $BF_{10} = 348.746$ ; Control:  $t_{(19)}$   
201  $= -4.869$ ,  $p < .001$ ,  $d = 1.089$ ,  $BF_{10} = 525.747$ ; Cursor Jump:  $t_{(19)} = -4.832$ ,  $p < .001$ ,  $d =$   
202  $1.080$ ,  $BF_{10} = 488.283$ ; Hand View:  $t_{(28)} = -2.372$ ,  $p = .012$ ,  $d = 0.440$ ,  $BF_{10} = 4.201$ ).  
203 These tests show that the attribution of error to external sources surprisingly does not  
204 reduce proprioceptive recalibration. Given that passive localization shifts reflect  
205 proprioceptive recalibration, a difference between active and passive localization shifts  
206 is likely due to efferent-based contributions. Thus, we measure efferent-based  
207 contributions or updates in predicted sensory consequences by removing afferent-  
208 based contributions (active minus passive; Fig. 6c,6f). We confirm the presence of  
209 updates in predictions for all groups with one-tailed t-tests comparing the mean shifts for  
210 each group to zero. We find that updates in predictions differ from zero for three groups  
211 (Instructed:  $t_{(20)} = -2.411$ ,  $p = .013$ ,  $d = 0.526$ ,  $BF_{10} = 4.570$ ; Control:  $t_{(19)} = -2.101$ ,  $p =$   
212  $.025$ ,  $d = 0.470$ ,  $BF_{10} = 2.729$ ; Cursor Jump:  $t_{(19)} = -2.751$ ,  $p = .006$ ,  $d = 0.615$ ,  $BF_{10} =$   
213  $8.327$ ), but not for the Hand View group ( $t_{(28)} = -0.037$ ,  $p = .485$ ,  $d = 0.007$ ,  $BF_{10} =$   
214  $0.203$ ). However, a Bayesian t-test comparing updates in predictions between the  
215 Control and Hand View groups provides little evidence for a difference between the two  
216 ( $BF_{10} = 1.225$ ). On the other hand, reduced or absent updates in prediction could  
217 explain that active and passive localization shifts are not much different in the Hand  
218 View group. These results show that external error attribution might decrease or even  
219 eliminate efferent-based contributions to hand localization, but clearly does not affect  
220 afferent contributions to hand localization.

221 We then investigate whether the processes underlying afferent and efferent-  
222 based estimates of hand localization may independently be contributing to motor  
223 behaviour. Sensory prediction-error based learning should lead to updated predictions  
224 of hand location and contribute to reach aftereffects <sup>[3,4,13,44-46]</sup>, and aftereffects have  
225 been shown to emerge in the absence of updates to efferent-based predictions <sup>[29,35-37]</sup>,  
226 showing that recalibrated proprioception may be associated with both changes in hand  
227 location estimates and changes in behaviour <sup>[47]</sup>. When considering either passive  
228 localization shifts or updates in predictions and their respective relationships with  
229 angular reach deviations in without-strategy no-cursor trials (Fig. 7a-7b), we find that  
230 both share a small relationship with implicit aftereffects (passive-aftereffects:  $p < .001$ ,  
231  $r^2_{adj} = .111$ ,  $BF_{10} = 34.473$ ; prediction-aftereffects:  $p = .004$ ,  $r^2_{adj} = .079$ ,  $BF_{10} = 7.309$ ).  
232 Moreover, a multiple regression with both variables as predictors and angular reach

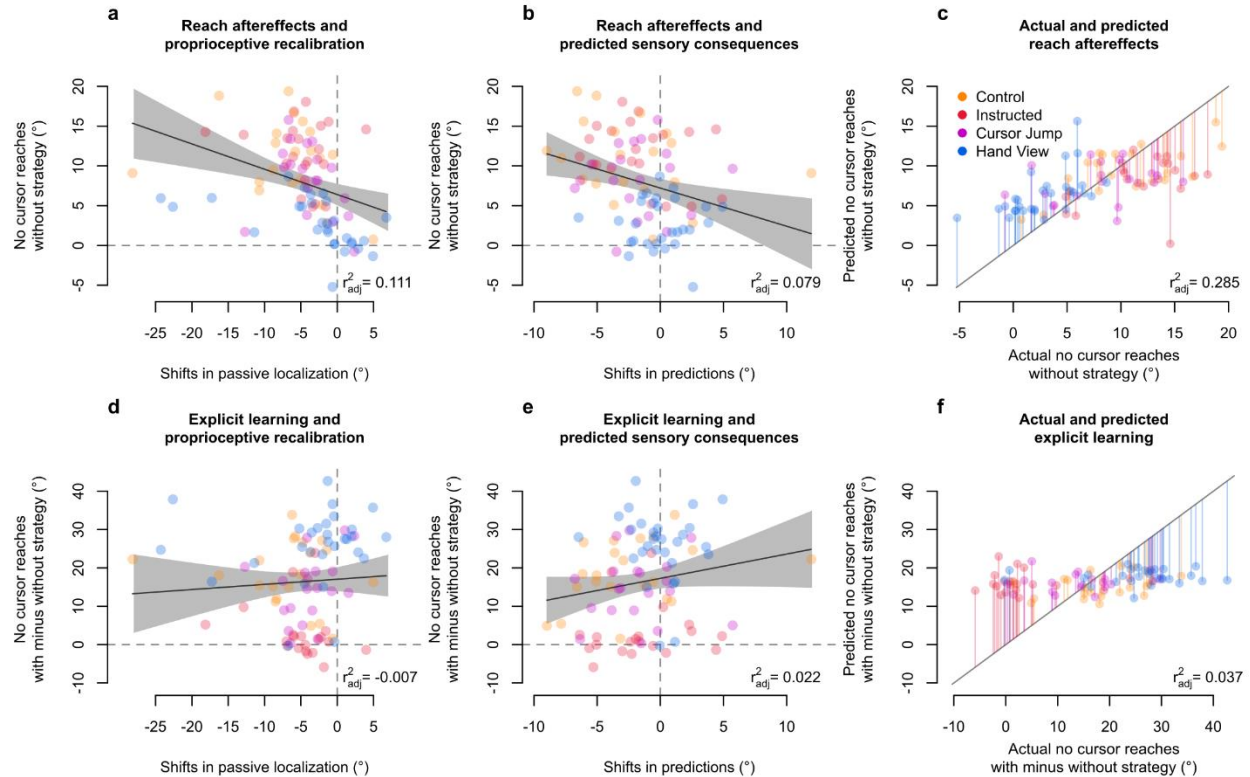

**Fig. 7: Contributions of afferent and efferent-based hand localization changes to implicit aftereffects and explicit learning.** Relationships of afferent and efferent-based changes in hand location estimates with reach deviations when no visual feedback of the cursor is presented, while either excluding any strategies used during adaptation training (implicit aftereffects; **a-b**), or taking the difference of including and excluding such strategies (explicit learning, **d-e**). Individual data points from all participants are colour-coded according to their respective groups. Solid line corresponds to a regression line, while the grey shaded region corresponds to 95% confidence intervals. We then validate the multiple regression model using both shifts in afferent and efferent-based hand localization as predictors, and show the predicted values for reach aftereffects plotted over observed values for reach aftereffects (**c**), as well as the predicted values for explicit learning plotted over observed values for explicit learning (**f**). The diagonal represents perfect prediction. Individual data points are colour-coded according to group, and lines represent residual errors.

233 deviations in without-strategy no-cursor trials as the dependent variable, shows that  
 234 both passive localization shifts ( $\beta = -0.430$ ,  $p < .001$ ,  $sr^2 = .204$ ) and updates in  
 235 predicted sensory consequences ( $\beta = -0.694$ ,  $p < .001$ ,  $sr^2 = .171$ ) are significantly  
 236 associated with reach aftereffects ( $r^2_{adj} = .276$ ,  $BF_{10} > 5 \cdot 10^4$ ). Importantly, both hand  
 237 localization components are still related to implicit reach aftereffects after accounting for  
 238 a group effect, showing that these relationships are not spurious (data and analysis  
 239 available on OSF<sup>[48]</sup>). Furthermore, given that we calculate afferent and efferent  
 240 contributions to hand localization as additive (see Methods), the two hand localization  
 241 components are independent from each other (confirmed by a low collinearity:  $vif =$   
 242  $1.087$ ). Finally, we validate our regression model by comparing predicted and observed  
 243 values of reach aftereffects (Fig. 7c). We find that model predictions are not perfect, but  
 244 relatively close to observed values ( $r^2_{adj} = .285$ ,  $BF_{10} > 3 \cdot 10^5$ ). The model is likely  
 245 incomplete, which would explain this disparity, but we don't investigate this further. In  
 246 contrast, explicit learning (i.e., with-strategy minus without-strategy reach deviations)



247 has a weak anti-correlation with efferent components of hand localization, and no  
248 relation with afferent components of hand localization shifts (Fig. 7d-7f; predicted and  
249 observed explicit learning:  $p = .038$ ,  $r^2_{adj} = .037$ ,  $BF_{10} = 0.911$ ). Thus, afferent and  
250 efferent-based components of hand localization shifts are weakly, but independently  
251 related with implicit reach aftereffects, hinting that at least two separate processes  
252 underlie implicit visuomotor adaptation.

## Discussion

253 We test if manipulating the extent of external error attribution affects both changes in  
254 motor behaviour and hand location estimates after visuomotor adaptation training.  
255 Particularly, the visual feedback of the hand-cursor either jumps to the imposed rotation  
256 mid-reach on every training trial, or is present along with a view of the actual hand of the  
257 participant. Given the mismatch between cursor and hand positions, errors should be  
258 attributed externally and not lead to changes in hand location estimates. In the Hand  
259 View group, despite the error source being clearly external, afferent-based  
260 (proprioceptive) hand location estimates still shift to the same extent as in other groups  
261 where external error attribution should be minimal. With both afferent and efferent-  
262 based estimates (active localization), shifts are not much different in the Hand View  
263 group compared to passive localization shifts. Furthermore, we find evidence that the  
264 Instructed, Cursor Jump, and Hand View groups developed an explicit strategy.  
265 However, the persistent but reduced implicit reach aftereffects in the Cursor Jump and  
266 Hand View groups, suggest that the feedback in these groups leads to less implicit  
267 learning. The reduction of aftereffects is more profound in the Hand View group, as  
268 could be expected with more external error attribution. Finally, we find that both afferent  
269 and efferent-based changes in hand localization share a relationship with implicit  
270 aftereffects. The persistent implicit motor changes and afferent-based changes in hand  
271 position estimates suggest that these are robust against external error attribution, while  
272 updating of efferent-based predicted sensory consequences is not.

273 In visuomotor adaptation, visual feedback of the hand is consistently shifted,  
274 which eventually updates estimates of the unseen hand after a movement [23-24,28,30-32,44-  
275 45]. These updates rely on at least two components: an efferent-based component,  
276 where the expected outcome of a motor command is updated to reflect the experienced,  
277 altered visual outcome of the movement, and an afferent component, where a  
278 proprioceptive signal is recalibrated to the experienced visual outcome [29,35,41]. People  
279 should not update either hand location estimate when the rotated cursor does not  
280 represent their true hand location. Yet, our previous results suggest that when explicit  
281 adaptation increases, due to instructions or increased rotation size, there is no  
282 concomitant decrease in updates of afferent and efferent-based estimates [18,49]. In the  
283 current study, despite the error source being clearly external in the Hand View group,  
284 we surprisingly find shifts in afferent-based hand location estimates across all groups.  
285 We also find evidence of efferent-based contributions to hand localization in the other  
286 three groups, while this is not so clearly present in the Hand View group. This could  
287 mean that heightened external error attribution in the Hand View group decreases  
288 efferent contributions to hand location estimates. Nevertheless, proprioceptive  
289 recalibration seems to be robust against varying degrees of explicit adaptation and  
290 external error attribution.

291 Changes in afferent-based hand location estimates seem to be a robust form of  
292 sensory plasticity, given its relatively quick emergence [28-29], persistence despite explicit  
293 adaptation [18], and its preservation despite aging [30,49] and within other forms of  
294 perturbations [23,31-34]. Furthermore, recalibrated proprioception is intact in people with  
295 mild cerebellar ataxia [50], despite the cerebellum's crucial role in adaptation [1,3,14,44-46,51-  
296 52]. This implies that proprioceptive recalibration relies on a signal different from efferent-  
297 based contributions to hand localization, such as a visuo-proprioceptive discrepancy  
298 [29,35,41]. Although there should be no visuo-proprioceptive discrepancy in the Hand View  
299 group, as they see and feel their hand, our findings suggest otherwise. Since the task is  
300 completed by bringing the cursor to the target, the cursor could be acting as a visual  
301 placeholder for the actual hand, while proprioceptive feedback is still veridical. This  
302 could create a sensory discrepancy, between seen cursor and felt hand, leading to  
303 sensory recalibration. Thus, the Hand View group does not show decreased shifts in  
304 afferent-based hand localization, despite external error attribution. It also seems that in  
305 only the Hand View group, there might not be an efferent-based contribution to hand  
306 localization, or one that is hard to detect. While this will have to be replicated, it is in line  
307 with previous findings [35,41] that also indicate that efferent and afferent contributions to  
308 hand localization rely on different error signals.

309 Aside from sensory recalibration, visuomotor adaptation also leads to implicit  
310 motor behaviour changes. Implicit learning is rather stable, but awareness of the  
311 perturbation's nature increases explicit contributions during adaptation [15-16,18-22,53-54].  
312 Here, participants make open-loop reaches with (implicit and explicit) or without  
313 (implicit) the strategy they learned. This process dissociation procedure (PDP, [16]) is  
314 consistent with similar tasks [53,55], has been used in previous studies [17-18,43,56], and  
315 doesn't seem to evoke additional explicit learning unlike other methods [56-58]. While  
316 explicit learning does not necessarily correspond to external error attribution, it is likely  
317 that external error attribution is accompanied by more explicit adaptation. Despite no  
318 elaborate instructions, the Cursor Jump and Hand View groups exhibit explicit learning  
319 like the Instructed group. Furthermore, it seems advantageous to suppress implicit  
320 learning with external and likely transient perturbations [6-10], making adaptation largely  
321 explicit or strategy-based [59-60]. Here, although implicit learning persists, we observe a  
322 small decrease in implicit adaptation in the Cursor Jump group, which is much more  
323 pronounced in the Hand View group. Although we expect increased external error  
324 attribution in the Cursor Jump and Hand View groups, this effect seems to be less clear  
325 for the Cursor Jump group. Nonetheless, we are certain that the Hand View group  
326 attributes the source of the error more externally than other groups.

327 A reduction of sensory prediction error-based learning may explain the reduced  
328 reach aftereffects and efferent-based hand localization shifts in the Hand View group.  
329 Implicit adaptation is based on sensory prediction errors [3-4,13,44-46], that both healthy  
330 individuals and people with cerebellar damage involuntarily engage in [1,3,14,46,52]. In the  
331 Hand View group, the balance between sensory prediction error-based learning and  
332 explicit strategy contributions to behaviour is changed. Consistent with previous studies  
333 using a similar condition as the Hand View group [46,59-60], our data suggest that  
334 increased external error attribution leads to reduced sensory prediction error-based  
335 visuomotor adaptation. Furthermore, efferent-based updates in predicted sensory



336 consequences contribute to hand location estimates. The decreased sensory prediction  
337 error-based learning should result in little to no shift in efferent-based hand position  
338 estimates. Thus, while afferent-based contributions to hand localization rely on visuo-  
339 proprioceptive discrepancy signals, changes in efferent-based contributions depend on  
340 sensory prediction error-based learning. Consequently, it seems that external error  
341 attribution only reduces sensory prediction error-based learning.

342         Reach aftereffects are evidence that people have updated their internal model,  
343 and hence efferent-based predictions, to adapt movements [5,11-12]. Recalibrated  
344 proprioception also informs movements [29,35-37,47,50,61]. First, preventing updates of  
345 internal models while allowing for proprioceptive recalibration, leads to reach  
346 aftereffects that follow the proprioceptive shift [29,32,35-37,47,50]. Second, recalibrated  
347 proprioception is at maximum within six trials or faster [28-29]. Both these findings make it  
348 unlikely that proprioceptive recalibration arises due to repeated hand movements  
349 performed during adaptation. One likely interpretation is that both changes in efferent-  
350 based predictions and recalibrated proprioception separately contribute to changes in  
351 motor behaviour (reach aftereffects). Here, we show with a multiple regression that both  
352 afferent and efferent changes are independently related to reach aftereffects in without-  
353 strategy no-cursor reaches. Given that, for now, we consider afferent and efferent  
354 contributions as additive in hand localization (see Methods), these contributions are  
355 necessarily statistically independent from each other. Moreover, our behavioural  
356 evidence shows that suppressed efferent-based changes in the Hand View group are  
357 tied to reduced implicit reach aftereffects. Based on these results, we speculate that the  
358 remaining reach aftereffects for the Hand View group are solely based on afferent  
359 changes. Regardless, our data show that changes in motor behaviour after learning  
360 take into account updates to our multi-modal internal estimates of hand location.

361         The changes in both afferent and efferent-based hand location estimates that  
362 rely on different error signals, and are independently related with changes in motor  
363 behaviour, are likely processed in different regions of the brain. While the relationship  
364 between implicit adaptation and sensory prediction error-based learning has been linked  
365 to the cerebellum [3-4,13,44-46], the visuo-proprioceptive discrepancy leading to  
366 recalibrated proprioception has been linked to parietal areas [25,31,62-63]. Particularly,  
367 parietal lesions that disrupt the angular gyrus in the posterior parietal cortex (PPC)  
368 affect the relationship between the weighting of visuo-proprioceptive information and  
369 corresponding realignment [62], which in turn affects corresponding activity in  
370 somatosensory and motor areas [25,63]. In the current study, the greatly reduced efferent-  
371 based changes and persistent afferent-based changes in hand location estimates, due  
372 to external error attribution in the Hand View group, show that processing for these two  
373 signals is dissociated to some degree in the brain. However, although afferent and  
374 efferent-based signals seem to be independently processed in brain, both the PPC and  
375 cerebellum have connections with premotor and motor cortical areas [25,63]. Here, we do  
376 find that afferent and efferent-based hand location estimates share small but significant  
377 relationships with implicit reach aftereffects. Thus, our data are consistent with the  
378 interpretation that the independent signals used in updating our hand location estimates  
379 are likely integrated within premotor and motor areas, and consequently affect our  
380 motor behaviours.

381 In summary, external error attribution affects changes in our internal estimates of  
382 hand location and motor behaviour. Particularly, changes in afferent-based  
383 (proprioceptive) estimates of hand location are so robust, that the resulting recalibration  
384 is unaffected by external error attribution. However, external error attribution can be  
385 manipulated to change efferent-based, sensory prediction error-based learning. As  
386 adaptation becomes less reliant on sensory prediction error-based learning, implicit  
387 motor behaviour changes (reach aftereffects) are consequently reduced. We also find  
388 behavioural evidence that these afferent and efferent-based estimates contribute  
389 independently to motor behaviour changes. Taken together, it seems that proprioceptive  
390 plasticity plays an important role when updating our hand location estimates after  
391 experiencing movement errors, as sensory prediction error-based processes are  
392 reduced with increased external error attribution, but visuo-proprioceptive recalibration  
393 is impervious to this.

## Methods

### Participants

394 Ninety right-handed university students (64 female,  $M_{Age} = 20.8$ ,  $SD_{Age} = 3.88$ ) were  
395 assigned to one of four groups: Control ( $n = 20$ , 14 females), Instructed ( $n = 21$ , 13  
396 females), Cursor Jump ( $n = 20$ , 14 females), and Hand View ( $n = 29$ , 23 females). Data  
397 for the Instructed and Control groups have been used in our earlier work and are  
398 publicly available on OSF <sup>[18]</sup>. In those two data sets, the samples (~20 participants per  
399 group) were large enough to detect differences between active and passive localization  
400 shifts (see also <sup>[41]</sup>,  $n = 19$ ). For the Cursor Jump group, the sample size matched these  
401 reference groups. Since, to our knowledge, no previous study has compared active and  
402 passive hand localization shifts after training with a full view of the hand, we ensured  
403 sufficient power to detect subtler effects by adding more participants to the Hand View  
404 group. All participants gave written informed consent prior to participating. All  
405 procedures were in accordance with institutional and international guidelines. All  
406 procedures were approved by York University's Human Participants Review Committee.

### Experimental Set-up

#### Apparatus

407 Participants held the handle of a 2-joint robot manipulandum (Interactive Motion  
408 Technologies Inc., Cambridge, MA, USA) with their right hand, while placing their thumb  
409 on top of the handle. A downward facing monitor (Samsung 510 N, 60 Hz) 28 cm above  
410 the manipulandum projected visual stimuli on a reflective tint (14 cm above the  
411 manipulandum), making the stimuli appear on the same horizontal plane as the  
412 participant's hand (Fig. 1a-1c). The reflective tint is applied to plexiglass and achieves  
413 the same result as a half-silvered mirror. Participants responded using their visible left  
414 hand in some tasks on a touchscreen 2 cm above the manipulandum (Fig. 1d). The  
415 right hand was occluded from the participant's view and a black cloth was draped over  
416 their right arm and shoulder. For the Hand View group, the right hand was illuminated in  
417 some tasks, making it visible to the participant.

## Stimuli

418 Participants made smooth and straight 12 cm out-and-back reaching movements from  
419 the “home position” to one of three targets (or arcs). Targets and arcs were presented  
420 once in a shuffled order before being presented again, such that reach directions were  
421 evenly distributed across trial types (Fig. 2).

422 **Cursor Training Trials.** Participants kept a green cursor (circle, 1 cm diameter),  
423 representing their right thumb, at the home position for 300 ms. A yellow target (circle, 1  
424 cm diameter) then appeared at one of three possible locations: 45°, 90°, 135° in polar  
425 coordinates. Once the target was acquired, they held the cursor for 300 ms within 0.5  
426 cm of the target’s centre. Afterwards, both stimuli disappeared, and participants  
427 returned their hand to the home position via a robot-constrained path (perpendicular  
428 resistance force: 2 N/(mm/s); viscous damping: 5 N/(mm/s)). Participants in the Hand  
429 View group saw their right hand along with the cursor throughout these trials. For these  
430 trials, we calculated the angular difference between the hand position at the peak of  
431 movement velocity and the target, relative to the home position. Thus, once the rotation  
432 is introduced, full adaptation should then result in angular reach deviations of 30°.

433 **No-Cursor Trials.** These proceeded similarly to cursor training trials, but without visual  
434 feedback from the cursor or hand (Fig. 1f). Participants kept stationary for 500 ms once  
435 they believe they had acquired the target with their unseen right hand, making the target  
436 disappear. They returned to the home position via the constrained path.

437 During the rotated session, participants completed two variations of no-cursor  
438 trials in succession (with- and without-strategy; Fig. 2). Using the process dissociation  
439 procedure from Werner et al. (PDP; <sup>[16]</sup>), we instructed participants to either include or  
440 exclude any consciously accessible strategy they developed to counter for the  
441 visuomotor rotation, to measure implicit and explicit adaptation. The order of these  
442 blocks was counter-balanced within one participant and between participants (Fig. 2).  
443 For all no-cursor trials, we calculated the angular difference between the endpoint of the  
444 participant’s hand movement and the target, relative to the home position. Considering  
445 reach endpoints makes this data set comparable to those from localization trials.

446 **Localization Trials.** Participants saw a white arc (0.5 cm thick) 12 cm away from the  
447 home position (Fig. 1e), which spanned 60°, and was centred on either the 50°, 90°, or  
448 130° mark in polar coordinates. In self-generated active localization trials, participants  
449 moved their unseen right hand from the home position to any point on the arc, and were  
450 instructed to vary their chosen crossing points across trials. In passive localization trials,  
451 the robot guided the participant’s right hand towards the same points on the arc that  
452 they intersected during active localization trials in the preceding task. Regardless of  
453 localization type, a cushion force prevented hand movements from moving beyond the  
454 arc position. Participants then voluntarily returned their right hand to the home position  
455 via the constrained path, and used their visible left hand to indicate on the touchscreen  
456 the point at which they believed their unseen right hand intersected the arc.

## **Procedure**

457 The aligned session served as baseline data, and started with aligned cursor training  
458 trials, followed by blocks of active localization, passive localization, and no-cursor trials  
459 respectively (Fig. 2). Localization and no-cursor blocks were repeated in the same order  
460 for three more times during this session. To prevent decay in learning, we interleaved  
461 shorter blocks of “top-up” cursor training trials between every localization and no-cursor  
462 block. The aligned session ended upon completion of the fourth no-cursor block.

463 Participants were given a mandatory five-minute break. During this break, the  
464 Instructed group was informed about the nature of the perturbation and was given a  
465 strategy to counter it (see <sup>[15,18]</sup> for details). The other groups were simply advised to  
466 compensate since the cursor would be “moving differently”, and to remember any  
467 strategy they develop as they would be asked to either use or not use it.

468 In the following session, the cursor was rotated 30° clockwise (CW) relative to  
469 the hand position for all cursor training trials. Hence, correcting for this perturbation  
470 requires straight reaches in the 30° counterclockwise (CCW) direction. Regardless of  
471 instructions received during the break, both Instructed and Control groups simply  
472 experienced this perturbation. For the Cursor Jump group, the cursor shifted to this  
473 rotated trajectory after participants moved for one-third (4 cm) of the home-target  
474 distance (Fig. 1b). For the Hand View group, illuminating the right hand allowed  
475 participants to see the misalignment between cursor and hand, making this the clearest  
476 demonstration that the error was caused externally (Fig. 1c). The rotated session  
477 proceeded similarly to the aligned session. However, to saturate learning of the  
478 visuomotor rotation, we increased the number of cursor training trials in each block (Fig.  
479 2). Moreover, each block of no-cursor trials was done twice, each in one variation (with-  
480 strategy or without-strategy).

## **Data Analysis**

481 We compared all four groups within the different trial types. Results from frequentist  
482 tests are reported with an alpha level of 0.05. Greenhouse-Geisser corrections were  
483 applied when necessary. Planned follow-up tests used the Sidak method when it was  
484 necessary to correct for multiplicity. Degrees of freedom for follow-up tests are larger  
485 than expected in some cases, as it uses a model fit on all the data (R emmeans  
486 package, <sup>[64]</sup>). For the figures, estimates of confidence intervals were bootstrapped to  
487 represent the individual data better, but confidence intervals for grouped data and the  
488 corresponding statistical tests were based on sample t-distributions. All data  
489 preprocessing and analyses were conducted in R version 3.6.0 <sup>[65]</sup>. Bayesian statistics  
490 are reported for each corresponding frequentist test and were conducted in JASP  
491 version 0.11.1 <sup>[66]</sup>. Follow-up tests for Bayesian ANOVAs were only conducted on main  
492 effects (*odds* values in Results). We conducted Bayesian t-tests to follow-up on  
493 interaction effects, without correcting for multiplicity.

## **Rate of Learning During Adaptation Training**

494 We analyzed cursor training trials from both the aligned and rotated sessions. Trials  
495 were manually inspected for outlier reaches (0.94% of trials removed). We corrected for

496 individual baseline biases by calculating the average reach deviation for each target  
497 separately within each participant, during the last 30 out of the first 45 aligned cursor  
498 training trials, and subtracting this from rotated cursor training trials. We compared  
499 angular reach deviation measures across all groups, within each one of three trial sets  
500 (rotated cursor training trials 1-3, 4-6, 76-90), to confirm learning and investigate any  
501 differences.

### ***Reach Aftereffects and Strategy Use***

502 We tested for group differences in reaches without cursor-feedback. Upon manual  
503 inspection, outlier reaches were removed (1.46% of trials). We confirmed the presence  
504 of reach aftereffects by comparing angular reach deviations from aligned no-cursor trials  
505 to without-strategy no-cursor trials. For the PDP <sup>[16,18]</sup>, we implemented baseline-  
506 correction (aligned session no-cursor reaches subtracted from no-cursor with- and  
507 without-strategy trials, respectively), before comparing angular reach deviations in with-  
508 and without-strategy trials.

### ***Proprioceptive Recalibration and Updating Predicted Sensory Consequences***

509 We investigated active and passive localization trials, before and after adaptation  
510 training. We calculated the angular difference between the endpoint of the participant's  
511 right hand movement and their left hand responses on the touchscreen, relative to the  
512 home position. Localization response biases were accounted for using a circle fitting  
513 procedure (see <sup>[35]</sup> for details). Trials with hand movement endpoints beyond  $\pm 20^\circ$  from  
514 the arc centre across all groups, and angular errors beyond  $\pm 3$  standard deviations from  
515 the mean angular error per participant were removed (1.06% of angular errors). We  
516 used a kernel smoothing method (gaussian kernel with bandwidth =  $15^\circ$ ) to interpolate  
517 changes in hand localization at specific points ( $50^\circ$ ,  $90^\circ$ ,  $130^\circ$ ) for every participant.  
518 Mean values at each of these points estimate active and passive hand localization  
519 errors for both the aligned and rotated sessions.

520 We compared hand localization errors in the rotated session to those in the  
521 aligned session. The difference of localization errors between the two sessions  
522 represents shifts in hand localization, and were compared across groups and movement  
523 type (active and passive). The difference between active and passive localization shifts  
524 were used as a measure of efferent-based updates in predicted sensory consequences,  
525 while passive localization shifts measured the afferent-based recalibration of  
526 proprioception. If afferent and efferent contributions to hand localization are optimally  
527 integrated (e.g. Bayesian integration), then variance in active localization should be  
528 lower than passive localization <sup>[41]</sup>. However, we have failed to find this in two earlier  
529 studies <sup>[35,41]</sup> as well as more recently, when we combined data from several studies, for  
530 a total of over 200 participants <sup>[67]</sup>. Thus, we take a parsimonious approach, and treat  
531 afferent and efferent contributions as additive in hand localization. We compared these  
532 measures for each group against zero, and investigated how both hand location  
533 estimates may contribute to implicit motor changes.



## Data Availability

Data, analyses scripts, and preprint are available on Open Science Framework (<https://doi.org/10.17605/osf.io/xdgh6> <sup>[48]</sup>).

## References

1. Martin, T. A., Keating, J. G., Goodkin, H. P., Bastian, A. J., & Thach, W. T. Throwing while looking through prisms II: specificity and storage of multiple gaze-throw calibrations. *Brain*. **119**, 1199-1211 (1996).
2. Krakauer, J. W., Pine, Z. M., Ghilardi, M.-F., & Ghez, C. Learning of visuomotor transformations for vectorial planning of reaching trajectories. *J. Neurosci.* **20**, 8916–8924 (2000).
3. Bastian, A. J. Understanding sensorimotor adaptation and learning for rehabilitation. *Curr. Opin. Neurol.* **21**, 628-633 (2008).
4. Shadmehr, R., Smith, M. A., & Krakauer, J. W. Error correction, sensory prediction, and adaptation in motor control. *Annu. Rev. Neurosci.* **33**, 89–108 (2010).
5. Krakauer, J. W., Hadjiosif, A. M., Xu, J., Wong, A. L., & Haith, A. M. Motor learning. *Compr. Physiol.* **9**, 613-663 (2019).
6. Berniker, M., & Körding, K. Estimating the sources of motor errors for adaptation and generalization. *Nat. Neurosci.* **11**, 1454-1461 (2008).
7. Berniker, M., & Körding, K. Estimating the relevance of world disturbances to explain savings, interference and long-term motor adaptation effects. *PLoS Comput. Biol.* **7**, e1002210; 10.1371/journal.pcbi.1002210 (2011).
8. Wei, K., & Körding, K. Relevance of error: what drives motor adaptation? *J. Neurophysiol.* **101**, 655–664 (2009).
9. Wilke, C., Synofzik, M., & Lindner, A. Sensorimotor recalibration depends on attribution of sensory prediction errors to internal causes. *PLoS ONE*. **8**, e54925; 10.1371/journal.pone.0054925 (2013).
10. Kong, G., Zhou, Z., Wang, Q., Körding, K., & Wei, K. Credit assignment between body and object probed by an object transportation task. *Sci. Rep.* **7**, 13415; 10.1038/s41598-017-13889-w (2017).
11. Krakauer, J. W. Motor learning and consolidation: the case of visuomotor rotation. *Adv. Exp. Med. Biol.* **629**, 405-421 (2009).
12. Krakauer, J. W. Motor learning: its relevance to stroke recovery and neurorehabilitation. *Curr. Opin. Neurol.* **19**, 84-90 (2006).
13. Mazzoni, P., & Krakauer, J. W. An implicit plan overrides an explicit strategy during visuomotor adaptation. *J. Neurosci.* **26**, 3642–3645 (2006).
14. Taylor, J. A., Klemfuss, N. M., & Ivry, R. B. An explicit strategy prevails when the cerebellum fails to compute movement errors. *Cerebellum*. **9**, 580-586 (2010).
15. Benson, B. L., Anguera, J. A., & Seidler, R. D. A spatial explicit strategy reduces error but interferes with sensorimotor adaptation. *J. Neurophysiol.* **105**, 2843–2851 (2011).
16. Werner, S. et al. Awareness of sensorimotor adaptation to visual rotations of different size. *PLoS ONE*. **10**, e0123321; 10.1371/journal.pone.0123321 (2015).
17. Neville, K. M., & Cressman, E. K. The influence of awareness on explicit and implicit contributions to visuomotor adaptation over time. *Exp. Brain Res.* **236**, 2047-2059 (2018).



18. Modchalingam, S., Vachon, C. M., 't Hart, B. M., & Henriques, D. Y. P. The effects of awareness of the perturbation during motor adaptation on hand localization. *PLoS ONE*. **14**, e0220884; 10.1371/journal.pone.0220884 (2019).
19. Taylor, J. A., & Ivry, R. B. Flexible cognitive strategies during motor learning. *PLoS Comput. Biol.* **7**, e1001096; 10.1371/journal.pcbi.1001096 (2011).
20. Taylor, J. A., & Ivry, R. B. The role of strategies in motor learning. *Ann. N. Y. Acad. Sci.* **1251**, 1-12 (2012).
21. Taylor, J. A., Krakauer, J. W., & Ivry, R. B. Explicit and implicit contributions to learning in a sensorimotor adaptation task. *J. Neurosci.* **34**, 3023–3032 (2014).
22. Bond, K. M., & Taylor, J. A. Flexible explicit but rigid implicit learning in a visuomotor adaptation task. *J. Neurophysiol.* **113**, 3836-3849 (2015).
23. Cressman, E. K., & Henriques, D. Y. P. Sensory recalibration of hand position following visuomotor adaptation. *J. Neurophysiol.* **102**, 3505–3518 (2009).
24. Cressman, E. K., & Henriques, D. Y. P. Generalization patterns for reach adaptation and proprioceptive recalibration differ after visuomotor learning. *J. Neurophysiol.* **114**, 354-365 (2015).
25. Ostry, D. J., & Gribble, P. L. Sensory plasticity in human motor learning. *Trends Neurosci.* **39**, 114-123 (2016).
26. Haith, A., Jackson, C. P., Miall, R. C., & Vijayakumar, S. Unifying the sensory and motor components of sensorimotor adaptation. *Adv. Neural Inf. Process. Syst.* 593-600 (2008).
27. Rabe, K. et al. Adaptation to visuomotor rotation and force field perturbation is correlated to different brain areas in patients with cerebellar degeneration. *J. Neurophysiol.* **101**, 1961-1971 (2009).
28. Ruttle, J. E., Cressman, E. K., 't Hart, B. M., & Henriques, D. Y. P. Time course of reach adaptation and proprioceptive recalibration during visuomotor learning. *PLoS ONE*. **11**, e0163695; 10.1371/journal.pone.0163695 (2016).
29. Ruttle, J. E., 't Hart, B. M., & Henriques, D. Y. P. The fast contribution of visual-proprioceptive discrepancy to reach aftereffects and proprioceptive recalibration. *PLOS ONE*. **13**, e0200621; 10.1371/journal.pone.0200621 (2018).
30. Cressman, E. K., Salomonczyk, D., & Henriques, D. Y. P. Visuomotor adaptation and proprioceptive recalibration in older adults. *Exp. Brain Res.* **205**, 533–544 (2010).
31. Ostry, D. J., Darainy, M., Mattar, A. A. G., Wong, J., & Gribble, P. L. Somatosensory plasticity and motor learning. *J. Neurosci.* **30**, 5384-5393 (2010).
32. Cameron, B. D., Franks, I. M., Inglis, J. T., & Chua, R. The adaptability of self-action perception and movement control when the limb is passively versus actively moved. *Conscious. Cogn.* **21**, 4–17 (2012).
33. Leech, K. A., Day, K. A., Roemmich, R. T., & Bastian, A. J. Movement and perception recalibrate differently across multiple days of locomotor learning. *J. Neurophysiol.* **120**, 2130–2137 (2018).
34. Sombric, C., Gonzalez-Rubio, M., & Torres-Oviedo, G. Split-belt walking induces changes in active, but not passive, perception of step length. *Sci. Rep.* **9**, 16442; 10.1038/s41598-019-52860-9 (2019).
35. Mostafa, A. A., 't Hart, B. M., & Henriques, D. Y. P. Motor learning without moving: proprioceptive and predictive hand localization after passive visuoproprioceptive discrepancy training. *PLoS ONE*. **14**, e0221861; 10.1371/journal.pone.0221861 (2019).
36. Cressman, E. K., & Henriques, D. Y. P. Reach adaptation and proprioceptive recalibration following exposure to misaligned sensory input. *J. Neurophysiol.* **103**, 1888-1895 (2010).

37. Salomonczyk, D., Cressman, E. K., & Henriques, D. Y. P. The role of the cross-sensory error signal in visuomotor adaptation. *Exp. Brain Res.* **228**, 313-325 (2013).
38. Blakemore, S. J., Goodbody, S. J., & Wolpert, D. M. Predicting the consequences of our own actions: the role of sensorimotor context estimation. *J. Neurosci.* **18**, 7511-7518 (1998).
39. Wolpert, D. M., & Kawato, M. Multiple paired forward and inverse models for motor control. *Neural Networks.* **11**, 1317-1329 (1998).
40. Haith, A. M., & Krakauer, J. W. Model-based and model-free mechanisms of human motor learning. *Adv. Exp. Med. Biol.* **782**, 1–21 (2013).
41. 't Hart, B. M., & Henriques, D. Y. P. Separating predicted and perceived sensory consequences of motor learning. *PLoS ONE.* **11**, e0163556; 10.1371/journal.pone.0163556 (2016).
42. Balitsky-Thompson, A. K. & Henriques, D. Y. P. Visuomotor adaptation and intermanual transfer under different viewing conditions. *Exp. Brain Res.* **202**, 543-552 (2010).
43. Werner, S., Struder, H. K., & Donchin, O. Intermanual transfer of visuomotor adaptation is related to awareness. *PLoS ONE.* **14**, e0220748; 10.1371/journal.pone.0220748 (2019).
44. Synofzik, M., Lindner, A., & Thier, P. The cerebellum updates predictions about the visual consequences of one's behaviour. *Curr. Biol.* **18**, 814–818 (2008).
45. Izawa, J., Criscimagna-Hemminger, S. E., & Shadmehr, R. Cerebellar contributions to reach adaptation and learning sensory consequences of action. *J. Neurosci.* **32**, 4230–4239 (2012).
46. Wong, A. L., Marvel, C. L., Taylor, J. A., & Krakauer, J. W. Can patients with cerebellar disease switch learning mechanisms to reduce their adaptation deficits? *Brain.* **142**, 662-673 (2019).
47. Henriques, D. Y. P., & Cressman, E. K. Visuomotor adaptation and proprioceptive recalibration. *J. Mot. Behav.* **44**, 435-444 (2012).
48. Gastrock, R. Q., Modchalingam, S., 't Hart, B. M., & Henriques, D. Y. P. External source attribution and adaptation while viewing the hand. *OSF* <https://doi.org/10.17605/OSF.IO/XDGH6> (2020).
49. Vachon, C.M., Modchalingam, S., 't Hart, B.M., Henriques, D.Y.P. The effect of age on visuomotor learning processes. *PLoS ONE.* **15**, e0239032; 10.1371/journal.pone.0239032 (2020).
50. Henriques, D. Y. P., Filippopoulos, F., Straube, A., & Eggert, T. The cerebellum is not necessary for visually driven recalibration of hand proprioception. *Neuropsychologia.* **64**, 195–204 (2014).
51. Bastian, A. J. Learning to predict the future: the cerebellum adapts feedforward movement control. *Curr. Opin. Neurobiol.* **16**, 645–649 (2006).
52. Tseng, Y. W., Diedrichsen, J., Krakauer, J. W., Shadmehr, R., & Bastian, A. J. Sensory prediction errors drive cerebellum-dependent adaptation of reaching. *J. Neurophysiol.* **98**, 54–62 (2007).
53. Heuer, H., & Hegele, M. Adaptation to visuomotor rotations in younger and older adults. *Psychol. Aging.* **23**, 190–202 (2008).
54. McDougale, S. D., Bond, K. M., & Taylor, J. A. Explicit and implicit processes constitute the fast and slow processes of sensorimotor learning. *J. Neurosci.* **35**, 9568–9579 (2015).
55. Hegele, M., & Heuer, H. Age-related variations of visuomotor adaptation result from both the acquisition and the application of explicit knowledge. *Psychol. Aging.* **28**, 333–339 (2013).
56. Maresch, J., Werner, S., & Donchin, O. Methods matter: your measures of explicit and implicit processes in visuomotor adaptation affect your results. Preprint at <https://doi.org/10.1101/702290> (2020).

57. Leow, L., Gunn, R., Marinovic, W., Carroll, T. J. Estimating the implicit component of visuomotor rotation learning by constraining movement preparation time. *J. Neurophysiol.* **118**, 666-676 (2017).
58. de Brouwer, A. J., Albaghdadi, M., Flanagan, J. R., Gallivan, J. P. Using gaze behaviour to parcellate the explicit and implicit contributions to visuomotor learning. *J. Neurophysiol.* **120**, 1602-1615 (2018).
59. Ong, N. T., & Hodges, N. J. Absence of after-effects for observers after watching a visuomotor adaptation. *Exp. Brain Res.* **205**, 325-334 (2010).
60. Ong, N. T., Larssen, B. C., & Hodges, N. J. In the absence of physical practice, observation and imagery do not result in updating of internal models for aiming. *Exp. Brain Res.* **218**, 9-19 (2012).
61. Wong, J. D., Kistemaker, D. A., Chin, A., & Gribble, P. L. Can proprioceptive training improve motor learning? *J. Neurophysiol.* **108**, 3313-3321 (2012).
62. Block, H., Bastian, A., & Celnik, P. Virtual lesion of angular gyrus disrupts the relationship between visuoproprioceptive weighting and realignment. *J. Cogn. Neurosci.* **25**, 636-648 (2013).
63. Munoz-Rubke, F., Mirdamadi, J. L., Lynch, A. K., & Block, H. J. Modality-specific changes in motor cortex excitability after visuo-proprioceptive realignment. *J. Cogn. Neurosci.* **29**, 2054-2067 (2017).
64. Lenth, R. emmeans: estimated marginal means, aka least-squares means. *R package version 1.4.3.01*. <https://CRAN.R-project.org/package=emmeans> (2019).
65. R Core Team. R: a language and environment for statistical computing. *R Foundation for Statistical Computing, Vienna, Austria* URL <https://www.R-project.org/> (2019).
66. JASP Team. JASP (version 0.11.1) [Computer software] (2020).
67. Ayala, M. N., 't Hart, B. M., & Henriques, D. Y. P. Efferent and afferent estimates of hand location do not optimally integrate. *Neuromatch 2.0*, poster, [https://deniseh.lab.yorku.ca/files/2020/05/Ayala\\_2020\\_neuromatch2\\_poster.pdf?x64373](https://deniseh.lab.yorku.ca/files/2020/05/Ayala_2020_neuromatch2_poster.pdf?x64373) (2020).

## Acknowledgements

This work was supported by NSERC for DYPH; SSHRC, OGS, and VISTA for RQG; OGS, and VISTA for SM. The funders had no role in study design, data collection and analysis, decision to publish, or preparation of the manuscript.

## Author Contributions

BMtH and DYPH designed the research. RQG and SM collected the data. BMtH contributed experimental and analytic code. RQG, SM, and BMtH analyzed the data. RQG wrote the manuscript, which was carefully edited by all authors. The final version of the manuscript has been approved by all authors who agree to be accountable for all aspects of the work in ensuring that questions related to the accuracy or integrity of any part of the work are appropriately investigated and resolved.

## Conflict of Interest

The authors declare no competing interests.
